# Supplementary material
Source: PubMed Central journal article supplement (PMC7243351)
Supplement: NIHMS1569336-supplement-2.pdf [file NIHMS1569336-supplement-2.pdf]

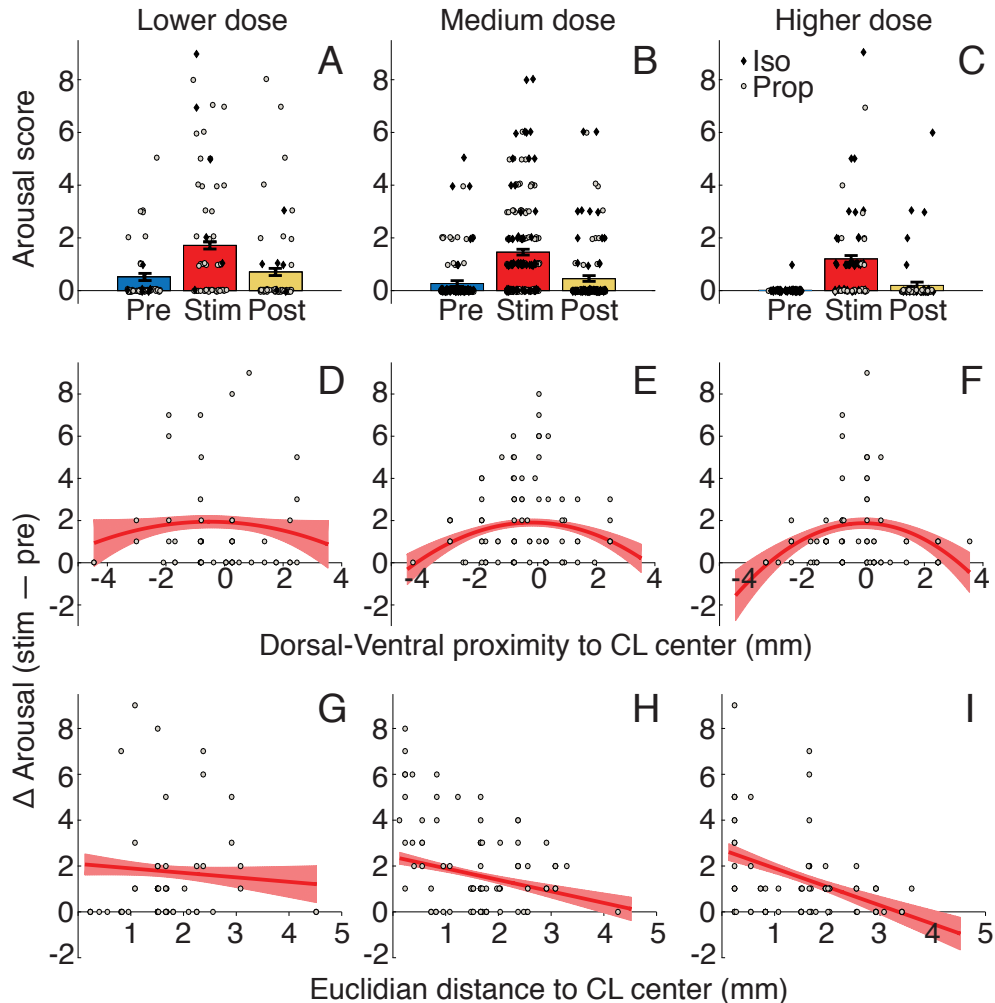

**Figure S1. Stimulation effects on arousal did not significantly differ for different anesthetics or doses. Related to Figure 1. (A-C)** Population mean arousal score ( $\pm$ SE) from both monkeys prior to (blue), during (red), and after (yellow) thalamic stimulation at (A) lower, (B) medium and (C) higher anesthetic doses in our experimental range. Individual stimulation events under isoflurane (diamonds) and propofol (circles) shown. Stimulation effects on arousal occur irrespective of dose; although the interaction is not significant, effects are slightly stronger at lower doses in our experimental range. (D-F) Change in stimulation-induced arousal (stim - pre) as a function of dorsal-ventral distance from CL center at (D) lower, (E) medium and (F) higher doses in our experimental range. Circles represent individual stimulation events. Red curve indicates quadratic fit ( $\pm$ SE). Proximity to CL has a slightly stronger effect under higher doses of anesthesia (i.e., stimulating array may need to be closer to CL center to induce arousal at higher doses), but the interaction is not significant. (G-I) Change in stimulation-induced arousal (stim - pre) as a function of Euclidian distance from CL center at (G) lower, (H) medium and (I) higher doses in our experimental range. Circles represent individual stimulation events. Red curve indicates linear fit ( $\pm$ SE). Proximity to CL is significantly predictive of arousal score regardless of dose. The effect is slightly stronger under higher doses of anesthesia, but the interaction is not significant.

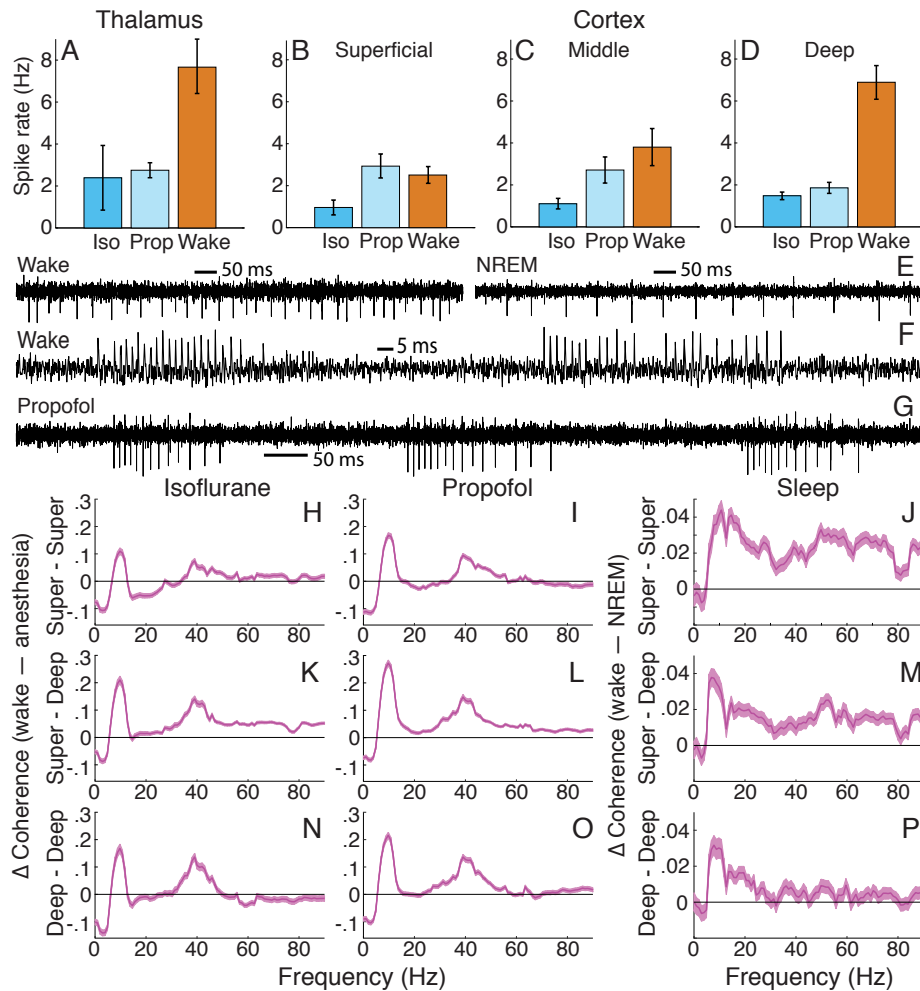

**Figure S2. Propofol and isoflurane had similar effects on spiking activity and intracolumnar interactions, consistent with light NREM sleep effects. Related to Figures 2 and 3.** (A-D) Spike rate of neurons recorded during isoflurane (Iso, blue), propofol (Prop, light blue) and wakefulness (Wake, orange) for (A) central lateral thalamic, (B) superficial cortical, (C) middle cortical and (D) deep cortical neurons. No significant differences were found between anesthetics. (E-G) Sample high-pass filtered traces of fast-spiking CL neurons across different states. (E) Example of CL neuron tonically firing at high spike rate during wakefulness ( $M = 59.32$  Hz), and reduced spike rate in sleep ( $M = 38.70$  Hz). (F) Example of fast-spiking ( $M = 52.83$  Hz) CL neuron bursting during wakefulness. Interspike interval commonly 1-2 ms within a burst, and 12-50 ms between bursts. (G) Example of CL neuron bursting during propofol anesthesia. (H-P) Population coherence difference between wakefulness and anesthesia, positive when wake > anesthesia (error bars show 95% confidence intervals of T-tests at each frequency), or difference between wakefulness and NREM sleep, positive when wake > sleep (error bars show 95% confidence intervals). Average difference of all contact pairs (cortical areas combined) for: superficial cortical layers relative to (H) isoflurane, (I) propofol and (J) sleep; between superficial and deep layers relative to (K) isoflurane, (L) propofol and (M) sleep; for deep layers relative to (N) isoflurane, (O) propofol and (P) sleep.

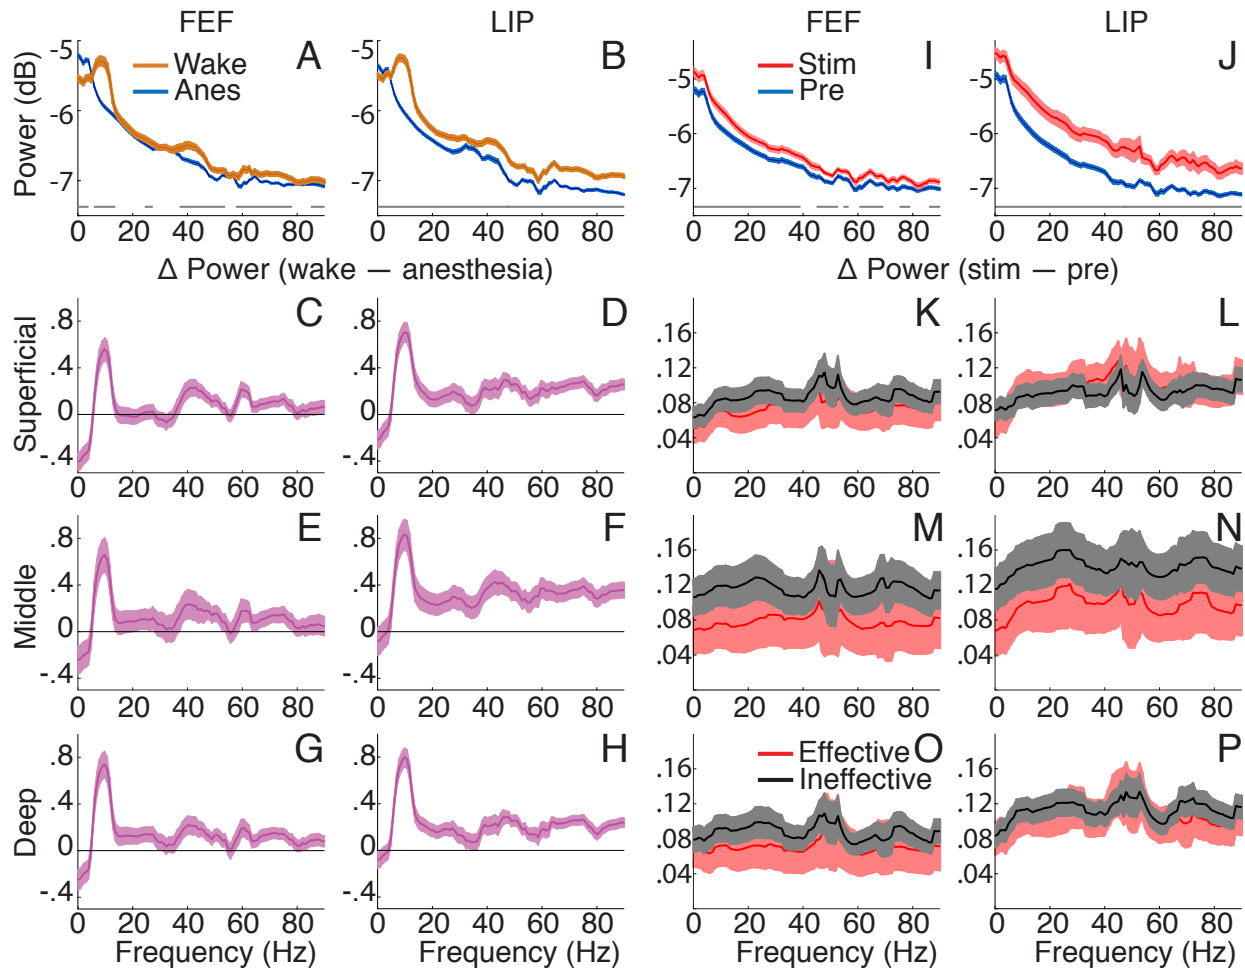

**Figure S3. Cortical power correlates poorly with arousal. Related to Figures 3 and 4.** Effects were not consistent between state (wake vs anesthesia) and stimulation (effective vs ineffective), and thus power is a poor predictor of behavioral arousal. **(A)** Population FEF and **(B)** LIP power spectra for wakefulness (orange) and anesthesia (blue). Average of all contacts across cortical layers. Line thickness indicates 95% confidence intervals. Gray lines show frequencies with significant differences between spectra (Holm's-corrected T-tests). **(C-H)** Population power difference between wakefulness and anesthesia. Positive when wake > anesthesia. Error bars indicate 95% confidence intervals of T-tests at each frequency. Average of all contacts for: superficial **(C)** FEF and **(D)** LIP; middle **(E)** FEF and **(F)** LIP; deep **(G)** FEF and **(H)** LIP. **(I)** Population FEF and **(J)** LIP power with 95% confidence intervals under anesthesia prior to (blue) and during effective stimulation (red). Average across all cortical layers. **(K-P)** Population power difference between effective (red) and ineffective (black) stimulations. Positive when stim > pre. Error bars indicate 95% confidence intervals. Average of all contacts for: superficial **(K)** FEF and **(L)** LIP; middle **(M)** FEF and **(N)** LIP; deep **(O)** FEF and **(P)** LIP.

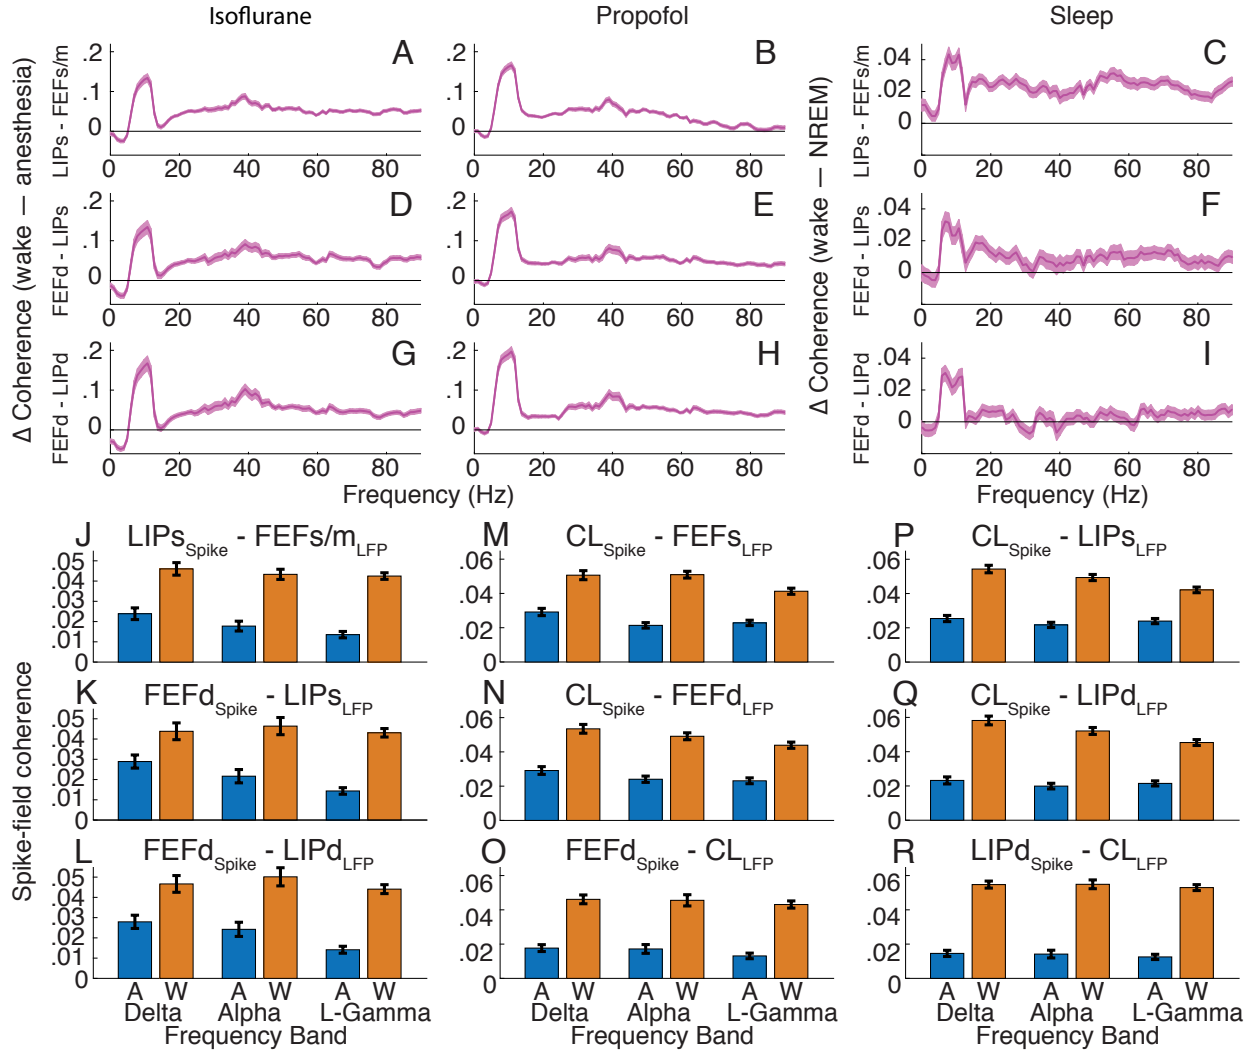

**Figure S4. Propofol, isoflurane, and light NREM sleep had similar influences on cross-area interactions. Related to Figure 4.** (A-I) Population average LFP-LFP coherence difference between wakefulness and anesthesia, positive when wake > anesthesia (error bars indicate 95% confidence intervals of T-tests at each frequency), or difference between wakefulness and sleep, positive when wake > sleep (error bars indicate 95% confidence intervals). Average difference of all contact pairs for: superficial LIP and superficial/mid FEF relative to (A) isoflurane, (B) propofol and (C) sleep; deep FEF and superficial LIP relative to (D) isoflurane, (E) propofol and (F) sleep; and deep FEF and deep LIP relative to (G) isoflurane, (H) propofol and (I) sleep. (J-R) Spike-field coherence ( $\pm$ SE) at delta (0-4 Hz), alpha (8-15 Hz) and low gamma (30-60 Hz) frequencies during wakefulness (W, orange) and anesthesia (A, blue). Average of all contact pairs for: (J) superficial LIP spikes and superficial/middle FEF LFPs; (K) deep FEF spikes and superficial LIP LFPs; (L) deep FEF spikes and deep LIP LFPs; (M) CL spikes and superficial FEF LFPs; (N) CL spikes and deep FEF LFPs; (O) deep FEF spikes and CL LFPs; (P) CL spikes and superficial LIP LFPs; (Q) CL spikes and deep LIP LFPs; and (R) deep LIP spikes and CL LFPs.

| Wake v Anes intracolumnar coherence                 |                                                                                                      |            |           |        |                        | Stimulation intracolumnar coherence                                                                            |                                                                                                           |            |           |       |                        |
|-----------------------------------------------------|------------------------------------------------------------------------------------------------------|------------|-----------|--------|------------------------|----------------------------------------------------------------------------------------------------------------|-----------------------------------------------------------------------------------------------------------|------------|-----------|-------|------------------------|
| M14                                                 | Data                                                                                                 | Band       | $\beta_1$ | T      | $p_{adj}$              | M19                                                                                                            | Data                                                                                                      | Band       | $\beta_1$ | T     | $p_{adj}$              |
| $C \sim \beta_0 + \beta_1 * State + \beta_2 * Area$ | <b>Sup <math>\leftrightarrow</math> Sup</b><br>$N_{Wake} = 4326$<br>$N_{Anes} = 5959$<br>DF = 10282  | $\delta$   | -0.104    | -28.08 | <1.0x10 <sup>-10</sup> | $CDiff(stim - pre) \sim \beta_0 + \beta_1 * StimEffect + \beta_2 * DoseCode + \beta_3 * Anes + \beta_4 * Area$ | <b>Sup <math>\leftrightarrow</math> Sup</b><br>$N_{Effect} = 845$<br>$N_{Ineffect} = 1544$<br>DF = 2384   | $\delta$   | -0.002    | -0.30 | 1.000                  |
|                                                     |                                                                                                      | $\theta$   | 0.002     | 0.43   | 1.000                  |                                                                                                                |                                                                                                           | $\theta$   | 0.009     | 1.18  | 1.000                  |
|                                                     |                                                                                                      | $\alpha$   | 0.076     | 20.86  | <1.0x10 <sup>-10</sup> |                                                                                                                |                                                                                                           | $\alpha$   | 0.017     | 2.44  | 0.119                  |
|                                                     |                                                                                                      | $\beta$    | -0.028    | -10.23 | <1.0x10 <sup>-10</sup> |                                                                                                                |                                                                                                           | $\beta$    | -0.004    | -0.85 | 1.000                  |
|                                                     |                                                                                                      | $\gamma_l$ | 0.014     | 5.91   | 1.7x10 <sup>-8</sup>   |                                                                                                                |                                                                                                           | $\gamma_l$ | 0.020     | 5.24  | 1.8x10 <sup>-6</sup>   |
|                                                     |                                                                                                      | $\gamma_h$ | -0.003    | -1.07  | 0.937                  |                                                                                                                |                                                                                                           | $\gamma_h$ | 0.003     | 0.77  | 1.000                  |
|                                                     | <b>Sup <math>\leftrightarrow</math> Deep</b><br>$N_{Wake} = 4196$<br>$N_{Anes} = 4529$<br>DF = 8722  | $\delta$   | -0.073    | -22.78 | <1.0x10 <sup>-10</sup> |                                                                                                                | <b>Sup <math>\leftrightarrow</math> Deep</b><br>$N_{Effect} = 826$<br>$N_{Ineffect} = 1805$<br>DF = 2626  | $\delta$   | 0.006     | 0.82  | 1.000                  |
|                                                     |                                                                                                      | $\theta$   | 0.086     | 23.29  | <1.0x10 <sup>-10</sup> |                                                                                                                |                                                                                                           | $\theta$   | 0.032     | 4.83  | 1.3x10 <sup>-6</sup>   |
|                                                     |                                                                                                      | $\alpha$   | 0.154     | 41.79  | <1.0x10 <sup>-10</sup> |                                                                                                                |                                                                                                           | $\alpha$   | 0.045     | 7.31  | <1.0x10 <sup>-10</sup> |
|                                                     |                                                                                                      | $\beta$    | 0.020     | 10.05  | <1.0x10 <sup>-10</sup> |                                                                                                                |                                                                                                           | $\beta$    | 0.021     | 5.42  | 7.3x10 <sup>-6</sup>   |
|                                                     |                                                                                                      | $\gamma_l$ | 0.054     | 25.12  | <1.0x10 <sup>-10</sup> |                                                                                                                |                                                                                                           | $\gamma_l$ | 0.032     | 10.45 | <1.0x10 <sup>-10</sup> |
|                                                     |                                                                                                      | $\gamma_h$ | 0.034     | 23.02  | <1.0x10 <sup>-10</sup> |                                                                                                                |                                                                                                           | $\gamma_h$ | 0.023     | 7.50  | <1.0x10 <sup>-10</sup> |
|                                                     | <b>Deep <math>\leftrightarrow</math> Deep</b><br>$N_{Wake} = 4378$<br>$N_{Anes} = 4316$<br>DF = 8691 | $\delta$   | -0.102    | -26.66 | <1.0x10 <sup>-10</sup> |                                                                                                                | <b>Deep <math>\leftrightarrow</math> Deep</b><br>$N_{Effect} = 699$<br>$N_{Ineffect} = 1484$<br>DF = 2178 | $\delta$   | 0.069     | 7.75  | <1.0x10 <sup>-10</sup> |
|                                                     |                                                                                                      | $\theta$   | 0.053     | 12.70  | <1.0x10 <sup>-10</sup> |                                                                                                                |                                                                                                           | $\theta$   | 0.070     | 9.04  | <1.0x10 <sup>-10</sup> |
|                                                     |                                                                                                      | $\alpha$   | 0.105     | 26.04  | <1.0x10 <sup>-10</sup> |                                                                                                                |                                                                                                           | $\alpha$   | 0.083     | 11.79 | <1.0x10 <sup>-10</sup> |
|                                                     |                                                                                                      | $\beta$    | -0.002    | -0.62  | 1.000                  |                                                                                                                |                                                                                                           | $\beta$    | 0.034     | 7.93  | <1.0x10 <sup>-10</sup> |
|                                                     |                                                                                                      | $\gamma_l$ | 0.036     | 11.87  | <1.0x10 <sup>-10</sup> |                                                                                                                |                                                                                                           | $\gamma_l$ | 0.008     | 2.21  | 0.190                  |
|                                                     |                                                                                                      | $\gamma_h$ | -0.004    | -1.19  | 0.937                  |                                                                                                                |                                                                                                           | $\gamma_h$ | 0.005     | 1.58  | 0.681                  |

**Table S1. Statistical results for intracolumnar cortical coherence in wakefulness and anesthesia, as well as during effective and ineffective thalamic stimulations. Related to Figure 3.** Analyses with model 14 and 19 performed for: delta ( $\delta$ ) = 0-4 Hz; theta ( $\theta$ ) = 4-8 Hz; alpha ( $\alpha$ ) = 8-15 Hz; beta ( $\beta$ ) = 15-30; low gamma ( $\gamma_l$ ) = 30-60 Hz; and high gamma ( $\gamma_h$ ) = 60-90 Hz for coherence pairs within/between different layers of cortical areas. Reported statistics are the slope ( $\beta_1$ ), T statistic (T) and Holm's adjusted p-value ( $p_{adj}$ ) for the parameter of interest ( $\beta_1 * State$  or  $\beta_1 * StimEffect$ ). Significant effects ( $p < 0.05$ ) show frequency bands where coherence is significantly different for wakefulness relative to anesthesia (Wake v Anes intracolumnar coherence), or for effective relative to ineffective stimulations (Stimulation intracolumnar coherence).

| Wake v Anes cortical and subcortical power                        |                                                                                |            |           |        |                        | Stimulation cortical power                                                                                                                                         |                                                                                     |            |           |       |           |
|-------------------------------------------------------------------|--------------------------------------------------------------------------------|------------|-----------|--------|------------------------|--------------------------------------------------------------------------------------------------------------------------------------------------------------------|-------------------------------------------------------------------------------------|------------|-----------|-------|-----------|
| M15 & 17                                                          | Data                                                                           | Band       | $\beta_1$ | T      | $p_{adj}$              | M20                                                                                                                                                                | Data                                                                                | Band       | $\beta_1$ | T     | $p_{adj}$ |
| $S \sim \beta_0 + \beta_1 * \text{State} + \beta_2 * \text{Area}$ | <b>Sup</b><br>$N_{\text{Wake}} = 793$<br>$N_{\text{Anes}} = 881$<br>DF = 1671  | $\delta$   | -0.264    | -9.26  | $<1.0 \times 10^{-10}$ | $S_{\text{Diff}}(\text{stim} - \text{pre}) \sim \beta_0 + \beta_1 * \text{StimEffect} + \beta_2 * \text{DoseCode} + \beta_3 * \text{Anes} + \beta_4 * \text{Area}$ | <b>Sup</b><br>$N_{\text{Effect}} = 241$<br>$N_{\text{Ineffect}} = 756$<br>DF = 856  | $\delta$   | -0.173    | -2.20 | 0.290     |
|                                                                   |                                                                                | $\theta$   | 0.257     | 8.57   | $<1.0 \times 10^{-10}$ |                                                                                                                                                                    |                                                                                     | $\theta$   | -0.110    | -1.34 | 1.000     |
|                                                                   |                                                                                | $\alpha$   | 0.424     | 14.04  | $<1.0 \times 10^{-10}$ |                                                                                                                                                                    |                                                                                     | $\alpha$   | -0.077    | -0.91 | 1.000     |
|                                                                   |                                                                                | $\beta$    | 0.078     | 3.35   | 0.003                  |                                                                                                                                                                    |                                                                                     | $\beta$    | -0.122    | -1.38 | 1.000     |
|                                                                   |                                                                                | $\gamma_l$ | 0.127     | 5.32   | $7.2 \times 10^{-7}$   |                                                                                                                                                                    |                                                                                     | $\gamma_l$ | -0.011    | -0.13 | 1.000     |
|                                                                   |                                                                                | $\gamma_h$ | 0.156     | 8.67   | $<1.0 \times 10^{-10}$ |                                                                                                                                                                    |                                                                                     | $\gamma_h$ | -0.107    | -1.20 | 1.000     |
|                                                                   | <b>Mid</b><br>$N_{\text{Wake}} = 294$<br>$N_{\text{Anes}} = 635$<br>DF = 632   | $\delta$   | -0.143    | -3.34  | 0.003                  |                                                                                                                                                                    | <b>Mid</b><br>$N_{\text{Effect}} = 91$<br>$N_{\text{Ineffect}} = 299$<br>DF = 343   | $\delta$   | -0.513    | -3.61 | 0.006     |
|                                                                   |                                                                                | $\theta$   | 0.385     | 8.61   | $<1.0 \times 10^{-10}$ |                                                                                                                                                                    |                                                                                     | $\theta$   | -0.531    | -3.56 | 0.007     |
|                                                                   |                                                                                | $\alpha$   | 0.493     | 11.15  | $<1.0 \times 10^{-10}$ |                                                                                                                                                                    |                                                                                     | $\alpha$   | -0.514    | -3.28 | 0.018     |
|                                                                   |                                                                                | $\beta$    | 0.167     | 5.06   | $2.7 \times 10^{-6}$   |                                                                                                                                                                    |                                                                                     | $\beta$    | -0.531    | -3.13 | 0.028     |
|                                                                   |                                                                                | $\gamma_l$ | 0.207     | 5.92   | $3.7 \times 10^{-8}$   |                                                                                                                                                                    |                                                                                     | $\gamma_l$ | -0.388    | -2.45 | 0.193     |
|                                                                   |                                                                                | $\gamma_h$ | 0.206     | 8.13   | $<1.0 \times 10^{-10}$ |                                                                                                                                                                    |                                                                                     | $\gamma_h$ | -0.483    | -3.00 | 0.040     |
|                                                                   | <b>Deep</b><br>$N_{\text{Wake}} = 709$<br>$N_{\text{Anes}} = 764$<br>DF = 1470 | $\delta$   | -0.120    | -4.23  | $9.8 \times 10^{-5}$   |                                                                                                                                                                    | <b>Deep</b><br>$N_{\text{Effect}} = 184$<br>$N_{\text{Ineffect}} = 726$<br>DF = 779 | $\delta$   | -0.141    | -1.58 | 0.803     |
|                                                                   |                                                                                | $\theta$   | 0.411     | 13.82  | $<1.0 \times 10^{-10}$ |                                                                                                                                                                    |                                                                                     | $\theta$   | -0.203    | -2.23 | 0.290     |
|                                                                   |                                                                                | $\alpha$   | 0.525     | 17.37  | $<1.0 \times 10^{-10}$ |                                                                                                                                                                    |                                                                                     | $\alpha$   | -0.188    | -2.03 | 0.341     |
|                                                                   |                                                                                | $\beta$    | 0.156     | 7.03   | $<1.0 \times 10^{-10}$ |                                                                                                                                                                    |                                                                                     | $\beta$    | -0.218    | -2.17 | 0.290     |
|                                                                   |                                                                                | $\gamma_l$ | 0.148     | 6.25   | $4.3 \times 10^{-9}$   |                                                                                                                                                                    |                                                                                     | $\gamma_l$ | -0.126    | -1.33 | 1.000     |
|                                                                   |                                                                                | $\gamma_h$ | 0.176     | 10.48  | $<1.0 \times 10^{-10}$ |                                                                                                                                                                    |                                                                                     | $\gamma_h$ | -0.216    | -2.26 | 0.290     |
| $S \sim \beta_0 + \beta_1 * \text{State}$                         | <b>CL</b><br>$N_{\text{Wake}} = 684$<br>$N_{\text{Anes}} = 1403$<br>DF = 2085  | $\delta$   | -0.415    | -14.94 | $<1.0 \times 10^{-10}$ |                                                                                                                                                                    |                                                                                     |            |           |       |           |
|                                                                   |                                                                                | $\theta$   | 0.374     | 13.05  | $<1.0 \times 10^{-10}$ |                                                                                                                                                                    |                                                                                     |            |           |       |           |
|                                                                   |                                                                                | $\alpha$   | 0.486     | 17.00  | $<1.0 \times 10^{-10}$ |                                                                                                                                                                    |                                                                                     |            |           |       |           |
|                                                                   |                                                                                | $\beta$    | -0.180    | -7.70  | $<1.0 \times 10^{-10}$ |                                                                                                                                                                    |                                                                                     |            |           |       |           |
|                                                                   |                                                                                | $\gamma_l$ | -0.290    | -10.94 | $<1.0 \times 10^{-10}$ |                                                                                                                                                                    |                                                                                     |            |           |       |           |
|                                                                   |                                                                                | $\gamma_h$ | -0.042    | -2.74  | 0.006                  |                                                                                                                                                                    |                                                                                     |            |           |       |           |

**Table S2. Statistical results for cortical and thalamic power in wakefulness and anesthesia, and for cortical power with effective and ineffective thalamic stimulations. Related to Figures 3, 4, and S3.** Analyses with model 15, 17 and 20 performed for: delta ( $\delta$ ) = 0-4 Hz; theta ( $\theta$ ) = 4-8 Hz; alpha ( $\alpha$ ) = 8-15 Hz; beta ( $\beta$ ) = 15-30 Hz; low gamma ( $\gamma_l$ ) = 30-60 Hz; and high gamma ( $\gamma_h$ ) = 60-90 Hz for different layers of cortical areas and for thalamus. Reported statistics are the slope ( $\beta_1$ ), T statistic (T) and Holm's adjusted p-value ( $p_{adj}$ ) for the parameter of interest ( $\beta_1 * \text{State}$  or  $\beta_1 * \text{StimEffect}$ ). Significant effects ( $p < 0.05$ ) show frequency bands where power is significantly different for wakefulness relative to anesthesia (Wake v Anes cortical and subcortical power), or for effective relative to ineffective stimulations (Stimulation cortical power).

| Wake v Anes corticocortical LFP-LFP coherence |                                                                                                                |            |           |       |                        | Stimulation corticocortical LFP-LFP coherence                                                 |                                                                                                                   |            |            |        |                       | Wake v Anes corticocortical spike-field coherence                |                                                                                                            |            |           |            |                        |        |                        |
|-----------------------------------------------|----------------------------------------------------------------------------------------------------------------|------------|-----------|-------|------------------------|-----------------------------------------------------------------------------------------------|-------------------------------------------------------------------------------------------------------------------|------------|------------|--------|-----------------------|------------------------------------------------------------------|------------------------------------------------------------------------------------------------------------|------------|-----------|------------|------------------------|--------|------------------------|
| M16                                           | Data                                                                                                           | Band       | $\beta_1$ | T     | $p_{adj}$              | M21                                                                                           | Data                                                                                                              | Band       | $\beta_1$  | T      | $p_{adj}$             | M18                                                              | Data                                                                                                       | Band       | $\beta_1$ | F          | $p_{adj}$              |        |                        |
| $C \sim \beta_0 + \beta_1 * State$            | <b>LIP<sub>s</sub></b><br>↕<br><b>FEF<sub>S/M</sub></b><br>$N_{Wake} = 3934$<br>$N_{Anes} = 3664$<br>DF = 7524 | $\delta$   | -0.012    | -6.91 | <1.0x10 <sup>-10</sup> | $CDiff(stim - pre) \sim \beta_0 + \beta_1 * StimEffect + \beta_2 * DoseCode + \beta_3 * Anes$ | <b>LIP<sub>s</sub></b> ↔<br><b>FEF<sub>S/M</sub></b><br>$N_{Effect} = 1258$<br>$N_{Ineffect} = 3397$<br>DF = 2794 | $\delta$   | -0.021     | -4.05  | 8.6x10 <sup>-4</sup>  | $spikeFC \sim \beta_0 + \beta_1 * State + \gamma_{neuron} * (1)$ | <b>LIP<sub>s</sub></b> ↔<br><b>FEF<sub>S/M</sub></b><br>$N_{Wake} = 30$<br>$N_{Anes} = 30$<br>DF = 57.43   | $\delta$   | 0.022     | 27.26      | 1.8x10 <sup>-5</sup>   |        |                        |
|                                               |                                                                                                                | $\theta$   | 0.070     | 32.30 | <1.0x10 <sup>-10</sup> |                                                                                               |                                                                                                                   | $\theta$   | 0.002      | 0.49   | 1.000                 |                                                                  |                                                                                                            | $\theta$   | 0.024     | 42.17      | 1.7x10 <sup>-7</sup>   |        |                        |
|                                               |                                                                                                                | $\alpha$   | 0.103     | 41.80 | <1.0x10 <sup>-10</sup> |                                                                                               |                                                                                                                   | $\alpha$   | 0.026      | 6.87   | 1.5x10 <sup>-10</sup> |                                                                  |                                                                                                            | $\alpha$   | 0.026     | 53.29      | 8.4x10 <sup>-9</sup>   |        |                        |
|                                               |                                                                                                                | $\beta$    | 0.045     | 50.98 | <1.0x10 <sup>-10</sup> |                                                                                               |                                                                                                                   | $\beta$    | 0.002      | 0.83   | 1.000                 |                                                                  |                                                                                                            | $\beta$    | 0.027     | 154.39     | <1.0x10 <sup>-10</sup> |        |                        |
|                                               |                                                                                                                | $\gamma_l$ | 0.061     | 46.64 | <1.0x10 <sup>-10</sup> |                                                                                               |                                                                                                                   | $\gamma_l$ | 0.012      | 4.45   | 1.5x10 <sup>-4</sup>  |                                                                  |                                                                                                            | $\gamma_l$ | 0.029     | 161.93     | <1.0x10 <sup>-10</sup> |        |                        |
|                                               |                                                                                                                | $\gamma_h$ | 0.027     | 19.48 | <1.0x10 <sup>-10</sup> |                                                                                               |                                                                                                                   | $\gamma_h$ | 0.008      | 3.03   | 0.027                 |                                                                  |                                                                                                            | $\gamma_h$ | 0.030     | 155.71     | <1.0x10 <sup>-10</sup> |        |                        |
|                                               | <b>FEF<sub>D</sub></b><br>↕<br><b>LIP<sub>s</sub></b><br>$N_{Wake} = 2634$<br>$N_{Anes} = 1816$<br>DF = 4410   | $\delta$   | -0.015    | -7.64 | <1.0x10 <sup>-10</sup> |                                                                                               | <b>FEF<sub>D</sub></b> ↔<br><b>LIP<sub>s</sub></b><br>$N_{Effect} = 598$<br>$N_{Ineffect} = 1974$<br>DF = 1613    | $\delta$   | -0.026     | -2.92  | 0.032                 |                                                                  | <b>FEF<sub>D</sub></b><br>↕<br><b>LIP<sub>s</sub></b><br>$N_{Wake} = 44$<br>$N_{Anes} = 74$<br>DF = 114.08 | $\delta$   | 0.015     | 8.04       | 0.005                  |        |                        |
|                                               |                                                                                                                | $\theta$   | 0.092     | 28.34 | <1.0x10 <sup>-10</sup> |                                                                                               |                                                                                                                   |            | $\theta$   | 0.009  | 1.18                  |                                                                  |                                                                                                            |            | 1.000     | $\theta$   | 0.026                  | 19.76  | 6.4x10 <sup>-5</sup>   |
|                                               |                                                                                                                | $\alpha$   | 0.118     | 31.12 | <1.0x10 <sup>-10</sup> |                                                                                               |                                                                                                                   |            | $\alpha$   | 0.027  | 3.97                  |                                                                  |                                                                                                            |            | 0.001     | $\alpha$   | 0.025                  | 21.23  | 6.3x10 <sup>-5</sup>   |
|                                               |                                                                                                                | $\beta$    | 0.039     | 30.06 | <1.0x10 <sup>-10</sup> |                                                                                               |                                                                                                                   |            | $\beta$    | -0.012 | -3.10                 |                                                                  |                                                                                                            |            | 0.024     | $\beta$    | 0.027                  | 71.84  | <1.0x10 <sup>-10</sup> |
|                                               |                                                                                                                | $\gamma_l$ | 0.071     | 41.86 | <1.0x10 <sup>-10</sup> |                                                                                               |                                                                                                                   |            | $\gamma_l$ | -0.001 | -0.41                 |                                                                  |                                                                                                            |            | 1.000     | $\gamma_l$ | 0.029                  | 116.59 | <1.0x10 <sup>-10</sup> |
|                                               |                                                                                                                | $\gamma_h$ | 0.044     | 32.50 | <1.0x10 <sup>-10</sup> |                                                                                               |                                                                                                                   |            | $\gamma_h$ | -0.014 | -3.44                 |                                                                  |                                                                                                            |            | 0.008     | $\gamma_h$ | 0.028                  | 123.53 | <1.0x10 <sup>-10</sup> |
|                                               | <b>FEF<sub>D</sub></b><br>↕<br><b>LIP<sub>D</sub></b><br>$N_{Wake} = 2083$<br>$N_{Anes} = 1947$<br>DF = 3968   | $\delta$   | -0.013    | -6.04 | 1.6x10 <sup>-9</sup>   |                                                                                               | <b>FEF<sub>D</sub></b> ↔<br><b>LIP<sub>D</sub></b><br>$N_{Effect} = 523$<br>$N_{Ineffect} = 2094$<br>DF = 1666    | $\delta$   | -0.019     | -2.14  | 0.226                 |                                                                  | <b>FEF<sub>D</sub></b><br>↕<br><b>LIP<sub>D</sub></b><br>$N_{Wake} = 45$<br>$N_{Anes} = 75$<br>DF = 115.19 | $\delta$   | 0.019     | 12.59      | 0.001                  |        |                        |
|                                               |                                                                                                                | $\theta$   | 0.082     | 27.24 | <1.0x10 <sup>-10</sup> |                                                                                               |                                                                                                                   |            | $\theta$   | -0.003 | -0.37                 |                                                                  |                                                                                                            |            | 1.000     | $\theta$   | 0.031                  | 20.33  | 6.4x10 <sup>-5</sup>   |
|                                               |                                                                                                                | $\alpha$   | 0.108     | 31.65 | <1.0x10 <sup>-10</sup> |                                                                                               |                                                                                                                   |            | $\alpha$   | 0.001  | 0.14                  |                                                                  |                                                                                                            |            | 1.000     | $\alpha$   | 0.026                  | 20.78  | 6.4x10 <sup>-5</sup>   |
|                                               |                                                                                                                | $\beta$    | 0.047     | 39.02 | <1.0x10 <sup>-10</sup> |                                                                                               |                                                                                                                   |            | $\beta$    | -0.011 | -3.01                 |                                                                  |                                                                                                            |            | 0.027     | $\beta$    | 0.031                  | 66.96  | <1.0x10 <sup>-10</sup> |
|                                               |                                                                                                                | $\gamma_l$ | 0.069     | 41.25 | <1.0x10 <sup>-10</sup> |                                                                                               |                                                                                                                   |            | $\gamma_l$ | -0.009 | -2.47                 |                                                                  |                                                                                                            |            | 0.109     | $\gamma_l$ | 0.030                  | 114.38 | <1.0x10 <sup>-10</sup> |
|                                               |                                                                                                                | $\gamma_h$ | 0.047     | 33.31 | <1.0x10 <sup>-10</sup> |                                                                                               |                                                                                                                   |            | $\gamma_h$ | -0.013 | -3.36                 |                                                                  |                                                                                                            |            | 0.010     | $\gamma_h$ | 0.029                  | 145.27 | <1.0x10 <sup>-10</sup> |

**Table S3. Statistical results for cross-area corticocortical coherence in wakefulness and anesthesia, as well as during effective and ineffective stimulations. Related to Figures 4 and S4.** Analyses with models 16, 21 and 18 performed for: delta ( $\delta$ ) = 0-4 Hz; theta ( $\theta$ ) = 4-8 Hz; alpha ( $\alpha$ ) = 8-15 Hz; beta ( $\beta$ ) = 15-30 Hz; low gamma ( $\gamma_l$ ) = 30-60 Hz; and high gamma ( $\gamma_h$ ) = 60-90 Hz for different pairs of contacts between FEF and LIP (deep (D), superficial (S), and middle (M) layers). Reported statistics are the slope ( $\beta_1$ ), T statistic (T) and Holm's adjusted p-value ( $p_{adj}$ ) for the parameter of interest ( $\beta_1 * State$  or  $\beta_1 * StimEffect$ ). Significant effects ( $p < 0.05$ ) show frequency bands where coherence is significantly different for wakefulness relative to anesthesia (Wake vs Anes corticocortical LFP-LFP or spike-field coherence), or for effective relative to ineffective stimulations (Stimulation corticocortical LFP-LFP coherence).

| Wake v Anes thalamocortical LFP-LFP coherence |                                                                                      |            |           |        |                        | Wake v Anes thalamocortical spike-field coherence                  |                                                                                   |            |           |        |                        |                                                                    |                                                                                  |                                                                                  |                                                                                   |                                                                                   |                        |                        |                        |                        |
|-----------------------------------------------|--------------------------------------------------------------------------------------|------------|-----------|--------|------------------------|--------------------------------------------------------------------|-----------------------------------------------------------------------------------|------------|-----------|--------|------------------------|--------------------------------------------------------------------|----------------------------------------------------------------------------------|----------------------------------------------------------------------------------|-----------------------------------------------------------------------------------|-----------------------------------------------------------------------------------|------------------------|------------------------|------------------------|------------------------|
| M16                                           | Data                                                                                 | Band       | $\beta_1$ | T      | $p_{adj}$              | M18                                                                | Data                                                                              | Band       | $\beta_1$ | F      | $p_{adj}$              | M18                                                                | Data                                                                             | Band                                                                             | $\beta_1$                                                                         | F                                                                                 | $p_{adj}$              |                        |                        |                        |
| $C \sim \beta_0 + \beta_1 * State$            | <b>CL ↔ FEF<sub>s</sub></b><br>$N_{Wake} = 3446$<br>$N_{Anes} = 9315$<br>DF = 12531  | $\delta$   | 0.030     | 20.68  | <1.0x10 <sup>-10</sup> | $spikeFC \sim \beta_0 + \beta_1 * State + + \gamma_{neuron} * (1)$ | <b>CL ↔ FEF<sub>s</sub></b><br>$N_{Wake} = 95$<br>$N_{Anes} = 154$<br>DF = 496.63 | $\delta$   | 0.021     | 47.95  | <1.0x10 <sup>-10</sup> | $spikeFC \sim \beta_0 + \beta_1 * State + + \gamma_{neuron} * (1)$ | <b>FEF<sub>D</sub> ↔ CL</b><br>$N_{Wake} = 45$<br>$N_{Anes} = 74$<br>DF = 116.27 | $\delta$                                                                         | 0.028                                                                             | 75.75                                                                             | <1.0x10 <sup>-10</sup> |                        |                        |                        |
|                                               |                                                                                      | $\theta$   | 0.084     | 59.83  | <1.0x10 <sup>-10</sup> |                                                                    |                                                                                   | $\theta$   | 0.029     | 154.65 | <1.0x10 <sup>-10</sup> |                                                                    |                                                                                  | $\theta$                                                                         | 0.029                                                                             | 88.22                                                                             | <1.0x10 <sup>-10</sup> |                        |                        |                        |
|                                               |                                                                                      | $\alpha$   | 0.097     | 64.15  | <1.0x10 <sup>-10</sup> |                                                                    |                                                                                   | $\alpha$   | 0.030     | 167.69 | <1.0x10 <sup>-10</sup> |                                                                    |                                                                                  | $\alpha$                                                                         | 0.028                                                                             | 46.28                                                                             | 4.7x10 <sup>-9</sup>   |                        |                        |                        |
|                                               |                                                                                      | $\beta$    | 0.045     | 57.72  | <1.0x10 <sup>-10</sup> |                                                                    |                                                                                   | $\beta$    | 0.024     | 156.47 | <1.0x10 <sup>-10</sup> |                                                                    |                                                                                  | $\beta$                                                                          | 0.030                                                                             | 100.97                                                                            | <1.0x10 <sup>-10</sup> |                        |                        |                        |
|                                               |                                                                                      | $\gamma_l$ | 0.065     | 66.28  | <1.0x10 <sup>-10</sup> |                                                                    |                                                                                   | $\gamma_l$ | 0.018     | 112.75 | <1.0x10 <sup>-10</sup> |                                                                    |                                                                                  | $\gamma_l$                                                                       | 0.030                                                                             | 126.02                                                                            | <1.0x10 <sup>-10</sup> |                        |                        |                        |
|                                               |                                                                                      | $\gamma_h$ | 0.027     | 22.74  | <1.0x10 <sup>-10</sup> |                                                                    |                                                                                   | $\gamma_h$ | 0.015     | 85.46  | <1.0x10 <sup>-10</sup> |                                                                    |                                                                                  | $\gamma_h$                                                                       | 0.030                                                                             | 134.45                                                                            | <1.0x10 <sup>-10</sup> |                        |                        |                        |
|                                               | <b>CL ↔ LIP<sub>s</sub></b><br>$N_{Wake} = 5282$<br>$N_{Anes} = 10478$<br>DF = 15466 | $\delta$   | 0.027     | 24.40  | <1.0x10 <sup>-10</sup> |                                                                    | <b>CL ↔ LIP<sub>s</sub></b><br>$N_{Wake} = 93$<br>$N_{Anes} = 155$<br>DF = 682.34 | $\delta$   | 0.029     | 135.27 | <1.0x10 <sup>-10</sup> |                                                                    | $spikeFC \sim \beta_0 + \beta_1 * State + + \gamma_{neuron} * (1)$               | <b>LIP<sub>D</sub> ↔ CL</b><br>$N_{Wake} = 62$<br>$N_{Anes} = 80$<br>DF = 139.67 | $\delta$                                                                          | 0.040                                                                             | 215.05                 | <1.0x10 <sup>-10</sup> |                        |                        |
|                                               |                                                                                      | $\theta$   | 0.123     | 83.19  | <1.0x10 <sup>-10</sup> |                                                                    |                                                                                   | $\theta$   | 0.028     | 159.64 | <1.0x10 <sup>-10</sup> |                                                                    |                                                                                  |                                                                                  | $\theta$                                                                          | 0.041                                                                             | 105.97                 | <1.0x10 <sup>-10</sup> |                        |                        |
|                                               |                                                                                      | $\alpha$   | 0.150     | 89.64  | <1.0x10 <sup>-10</sup> |                                                                    |                                                                                   | $\alpha$   | 0.028     | 223.56 | <1.0x10 <sup>-10</sup> |                                                                    |                                                                                  |                                                                                  | $\alpha$                                                                          | 0.041                                                                             | 141.49                 | <1.0x10 <sup>-10</sup> |                        |                        |
|                                               |                                                                                      | $\beta$    | 0.031     | 26.12  | <1.0x10 <sup>-10</sup> |                                                                    |                                                                                   | $\beta$    | 0.023     | 228.67 | <1.0x10 <sup>-10</sup> |                                                                    |                                                                                  |                                                                                  | $\beta$                                                                           | 0.040                                                                             | 249.93                 | <1.0x10 <sup>-10</sup> |                        |                        |
|                                               |                                                                                      | $\gamma_l$ | 0.058     | 54.91  | <1.0x10 <sup>-10</sup> |                                                                    |                                                                                   | $\gamma_l$ | 0.018     | 188.59 | <1.0x10 <sup>-10</sup> |                                                                    |                                                                                  |                                                                                  | $\gamma_l$                                                                        | 0.040                                                                             | 305.65                 | <1.0x10 <sup>-10</sup> |                        |                        |
|                                               |                                                                                      | $\gamma_h$ | 0.031     | 34.47  | <1.0x10 <sup>-10</sup> |                                                                    |                                                                                   | $\gamma_h$ | 0.018     | 199.69 | <1.0x10 <sup>-10</sup> |                                                                    |                                                                                  |                                                                                  | $\gamma_h$                                                                        | 0.040                                                                             | 267.00                 | <1.0x10 <sup>-10</sup> |                        |                        |
|                                               | <b>CL ↔ FEF<sub>D</sub></b><br>$N_{Wake} = 3561$<br>$N_{Anes} = 5675$<br>DF = 9074   | $\delta$   | -0.001    | -0.612 | 0.541                  |                                                                    | <b>CL ↔ FEF<sub>D</sub></b><br>$N_{Wake} = 94$<br>$N_{Anes} = 130$<br>DF = 616.41 | $\delta$   | 0.024     | 67.50  | <1.0x10 <sup>-10</sup> |                                                                    |                                                                                  | $spikeFC \sim \beta_0 + \beta_1 * State + + \gamma_{neuron} * (1)$               | <b>CL ↔ LIP<sub>D</sub></b><br>$N_{Wake} = 93$<br>$N_{Anes} = 155$<br>DF = 384.64 | $\delta$                                                                          | 0.035                  | 125.98                 | <1.0x10 <sup>-10</sup> |                        |
|                                               |                                                                                      | $\theta$   | 0.086     | 48.14  | <1.0x10 <sup>-10</sup> |                                                                    |                                                                                   | $\theta$   | 0.028     | 171.18 | <1.0x10 <sup>-10</sup> |                                                                    |                                                                                  |                                                                                  |                                                                                   | $\theta$                                                                          | 0.032                  | 181.38                 | <1.0x10 <sup>-10</sup> |                        |
|                                               |                                                                                      | $\alpha$   | 0.086     | 47.65  | <1.0x10 <sup>-10</sup> |                                                                    |                                                                                   | $\alpha$   | 0.025     | 144.29 | <1.0x10 <sup>-10</sup> |                                                                    |                                                                                  |                                                                                  |                                                                                   | $\alpha$                                                                          | 0.032                  | 183.38                 | <1.0x10 <sup>-10</sup> |                        |
|                                               |                                                                                      | $\beta$    | 0.040     | 49.62  | <1.0x10 <sup>-10</sup> |                                                                    |                                                                                   | $\beta$    | 0.024     | 181.38 | <1.0x10 <sup>-10</sup> |                                                                    |                                                                                  |                                                                                  |                                                                                   | $\beta$                                                                           | 0.029                  | 220.95                 | <1.0x10 <sup>-10</sup> |                        |
|                                               |                                                                                      | $\gamma_l$ | 0.054     | 58.00  | <1.0x10 <sup>-10</sup> |                                                                    |                                                                                   | $\gamma_l$ | 0.021     | 181.10 | <1.0x10 <sup>-10</sup> |                                                                    |                                                                                  |                                                                                  |                                                                                   | $\gamma_l$                                                                        | 0.024                  | 189.16                 | <1.0x10 <sup>-10</sup> |                        |
|                                               |                                                                                      | $\gamma_h$ | 0.042     | 45.84  | <1.0x10 <sup>-10</sup> |                                                                    |                                                                                   | $\gamma_h$ | 0.021     | 247.87 | <1.0x10 <sup>-10</sup> |                                                                    |                                                                                  |                                                                                  |                                                                                   | $\gamma_h$                                                                        | 0.022                  | 171.24                 | <1.0x10 <sup>-10</sup> |                        |
|                                               | <b>CL ↔ LIP<sub>D</sub></b><br>$N_{Wake} = 5806$<br>$N_{Anes} = 9581$<br>DF = 15029  | $\delta$   | 0.024     | 21.69  | <1.0x10 <sup>-10</sup> |                                                                    | <b>CL ↔ LIP<sub>D</sub></b><br>$N_{Wake} = 93$<br>$N_{Anes} = 155$<br>DF = 384.64 | $\delta$   | 0.035     | 125.98 | <1.0x10 <sup>-10</sup> |                                                                    |                                                                                  |                                                                                  | $spikeFC \sim \beta_0 + \beta_1 * State + + \gamma_{neuron} * (1)$                | <b>CL ↔ LIP<sub>D</sub></b><br>$N_{Wake} = 93$<br>$N_{Anes} = 155$<br>DF = 384.64 | $\delta$               | 0.035                  | 125.98                 | <1.0x10 <sup>-10</sup> |
|                                               |                                                                                      | $\theta$   | 0.147     | 94.76  | <1.0x10 <sup>-10</sup> |                                                                    |                                                                                   | $\theta$   | 0.032     | 181.38 | <1.0x10 <sup>-10</sup> |                                                                    |                                                                                  |                                                                                  |                                                                                   |                                                                                   | $\theta$               | 0.032                  | 181.38                 | <1.0x10 <sup>-10</sup> |
|                                               |                                                                                      | $\alpha$   | 0.161     | 102.90 | <1.0x10 <sup>-10</sup> |                                                                    |                                                                                   | $\alpha$   | 0.032     | 183.38 | <1.0x10 <sup>-10</sup> |                                                                    |                                                                                  |                                                                                  |                                                                                   |                                                                                   | $\alpha$               | 0.032                  | 183.38                 | <1.0x10 <sup>-10</sup> |
|                                               |                                                                                      | $\beta$    | 0.042     | 39.74  | <1.0x10 <sup>-10</sup> |                                                                    |                                                                                   | $\beta$    | 0.029     | 220.95 | <1.0x10 <sup>-10</sup> |                                                                    |                                                                                  |                                                                                  |                                                                                   |                                                                                   | $\beta$                | 0.029                  | 220.95                 | <1.0x10 <sup>-10</sup> |
|                                               |                                                                                      | $\gamma_l$ | 0.072     | 60.78  | <1.0x10 <sup>-10</sup> |                                                                    |                                                                                   | $\gamma_l$ | 0.024     | 189.16 | <1.0x10 <sup>-10</sup> |                                                                    |                                                                                  |                                                                                  |                                                                                   |                                                                                   | $\gamma_l$             | 0.024                  | 189.16                 | <1.0x10 <sup>-10</sup> |
|                                               |                                                                                      | $\gamma_h$ | 0.022     | 19.19  | <1.0x10 <sup>-10</sup> |                                                                    |                                                                                   | $\gamma_h$ | 0.022     | 171.24 | <1.0x10 <sup>-10</sup> |                                                                    |                                                                                  |                                                                                  |                                                                                   |                                                                                   | $\gamma_h$             | 0.022                  | 171.24                 | <1.0x10 <sup>-10</sup> |

**Table S4. Statistical results for thalamocortical LFP-LFP and spike-field coherence in wakefulness and anesthesia. Related to Figures 4 and S4.** Analyses with models 16 and 18 performed for: delta ( $\delta$ ), theta ( $\theta$ ), alpha ( $\alpha$ ), beta ( $\beta$ ), low gamma ( $\gamma_l$ ), and high gamma ( $\gamma_h$ ) for all contact pairs between thalamus and superficial (S) or deep (D) cortical layers in FEF or LIP. Reported statistics are the slope ( $\beta_1$ ), T statistic (T) and Holm's adjusted p-value ( $p_{adj}$ ) for the parameter of interest ( $\beta_1 * State$ ). Significant effects ( $p < 0.05$ ) show frequency bands where coherence is significantly different for wakefulness relative to anesthesia.
